# Supplementary material
Source: publisher site journal article supplement (https://www.dovepress.com/article/590272)
Supplement: Supplementary file 1 [file 590272%20Supplementary%20Material.docx]

Supplementary Table 1. Retinal and Choroidal Parameters in Patients with Precapillary Pulmonary Hypertension and Controls

|  | Variable | PPH Group | Control group | MD | 95% CI | p | B-H |
| --- | --- | --- | --- | --- | --- | --- | --- |
|  | Number of eyes | 29 | 37 |  |  |  |  |
| Total Retinal Thickness [µm] | Outer T | 278.11±19.26 | 283.76±12.08 | -5.65 | -14.02; 2.72 | 0.180 | 0.200 |
| Inner T | 314.29±21.54 | 326.81±10.14 | -12.53 | -21.45; -3.60 | **0.007** | **0.012** |
| Central Macular | 265.96±21.56 | 274.43±18.73 | -8.47 | -18.71; 1.77 | 0.103 | 0.129 |
| Outer N , median (Q1;Q3) | 301.50 (275.75;312.00) | 311.00 (304.00;319.00) | -9.50 | -26.00; -6.00 | **0.001a** | **0.003** |
| Inner N , median (Q1;Q3) | 327.00 (315.50;336.50) | 344.00 (338.00;351.00) | -17.00 | -24.00; -10.00 | **<0.001a** | **0.001** |
| Outer S | 288.64±16.43 | 298.03±10.79 | -9.38 | -16.59; -2.18 | **0.012** | **0.017** |
| Inner S , median (Q1;Q3) | 328.50 (308.75;340.00) | 342.00 (335.00;351.00) | -13.50 | -23.00; -5.00 | **0.001a** | **0.003** |
| Outer I | 278.68±15.73 | 288.84±11.48 | -10.16 | -17.24; -3.08 | **0.006** | **0.012** |
| Inner I | 323.25±18.40 | 338.08±10.57 | -14.83 | -22.69; -6.98 | **<0.001** | **0.001** |
| SFCT, median (Q1;Q3) | 229.00 (211.25;241.50) | 231.00 (218.00;246.00) | -2.00 | -16.00; 6.00 | 0.442a | 0.442 |
| Total Retinal Volume [µm3] | Outer T | 1.47±0.12 | 1.50±0.06 | -0.03 | -0.08; 0.02 | 0.237 | 0.237 |
| Inner T | 0.50±0.04 | 0.51±0.02 | -0.02 | -0.03; -0.002 | **0.024** | **0.030** |
| Central macular | 0.21±0.02 | 0.22±0.02 | -0.01 | -0.02; 0.001 | 0.079 | 0.088 |
| Outer N | 1.57±0.09 | 1.65±0.06 | -0.08 | -0.13; -0.04 | **<0.001** | **0.001** |
| Inner N | 0.51±0.04 | 0.54±0.02 | -0.03 | -0.04; -0.01 | **0.001** | **0.003** |
| Outer S | 1.53±0.09 | 1.58±0.06 | -0.05 | -0.09; -0.01 | **0.012** | **0.017** |
| Inner S | 0.51±0.03 | 0.54±0.02 | -0.02 | -0.04; -0.01 | **0.001** | **0.003** |
| Outer I | 1.48±0.08 | 1.53±0.06 | -0.06 | -0.09; -0.02 | **0.005** | **0.008** |
| Inner I | 0.51±0.03 | 0.53±0.02 | -0.02 | -0.04; -0.01 | **<0.001** | **0.001** |
| Total | 8.29±0.44 | 8.60±0.28 | -0.32 | -0.51; -0.13 | **0.002** | **0.004** |
| ORL Thickness [µm] | Inner T | 79.21±2.39 | 81.49±2.56 | -2.27 | -3.51; -1.04 | **0.001** | **0.001** |
| Central Macular | 84.25±3.52 | 88.22±2.51 | -3.97 | -5.54; -2.39 | **<0.001** | **<0.001** |
| Inner N | 79.89±2.23 | 81.97±2.30 | -2.08 | -3.21; -0.95 | **0.001** | **0.001** |
| Inner S | 79.07±2.57 | 81.51±2.39 | -2.44 | -3.69; -1.19 | **<0.001** | **<0.001** |
| Inner I | 78.39±2.88 | 80.00±2.94 | -1.61 | -3.07; -0.15 | **0.031** | **0.031** |
| RPE Thickness [µm] | Inner T | 13.71±1.36 | 14.41±0.80 | -0.69 | -1.27; -0.11 | **0.021** | **0.026** |
| Central Macular | 15.43±1.53 | 15.86±1.34 | -0.44 | -1.16; 0.29 | 0.234 | 0.234 |
| Inner N | 14.11±1.66 | 15.03±0.99 | -0.92 | -1.63; -0.21 | **0.013** | **0.022** |
| Inner S | 14.11±1.55 | 15.59±1.04 | -1.49 | -2.17; -0.80 | **<0.001** | **0.001** |
| Inner I | 13.46±1.71 | 14.81±1.17 | -1.35 | -2.10; -0.59 | **0.001** | **0.003** |
| ONL Thickness [µm] | Inner T | 69.68±7.47 | 71.54±9.77 | -1.86 | -6.14; 2.41 | 0.387 | 0.484 |
| Central Macular | 89.32±10.04 | 92.78±9.98 | -3.46 | -8.48; 1.56 | 0.173 | 0.387 |
| Inner N | 70.46±9.95 | 71.81±8.96 | -1.35 | -6.14; 3.44 | 0.575 | 0.575 |
| Inner S | 65.18±11.35 | 68.43±9.88 | -3.25 | -8.65; 2.14 | 0.232 | 0.387 |
| Inner I | 64.07±7.94 | 67.19±10.37 | -3.12 | -7.66; 1.42 | 0.175 | 0.387 |
| Inner Retinal Thickness [µm] | Inner T | 165.39±20.51 | 173.78±10.02 | -8.39 | -16.93; 0.14 | 0.054 | 0.086 |
| Central Macular | 92.39±22.50 | 93.43±17.04 | -1.04 | -11.27; 9.19 | 0.839 | 0.839 |
| Inner N , median (Q1;Q3) | 177.00 (164.75;188.00) | 191.00 (182.00;196.00) | -14.00 | -20.00; -6.00 | **<0.001a** | **<0.001** |
| Inner S , median (Q1;Q3) | 188.00 (168.00;198.50) | 193.00 (188.00;200.00) | -5.00 | -17.00; 0.001 | 0.069a | 0.086 |
| Inner I | 180.79±17.88 | 190.89±11.38 | -10.10 | -17.89; -2.32 | **0.012** | **0.030** |
| Choroidal Parameters | Central Macular Choroidal Thickness[µm] | 234.50±103.98 | 321.92±84.24 | -87.42 | -135.68; -39.15 | **0.001** | **0.003** |
| mTCA [µm2] | 316 721.88±111 974.98 | 359 879.53±93 926.44 | -43157.65 | -97 932.77; 11 617.47 | 0.120 | 0.240 |
| mLA [µm2] | 206 904.02±71 612.61 | 237 626.45±60 039.77 | -30722.43 | -65 748.01; 4 303.24 | 0.084 | 0.240 |
| mSA [µm2] | 109 817.86±41 602.39 | 122 253.08±35 948.58 | -12435.22 | -32 973.04; 8 102.59 | 0.229 | 0.305 |
| mCVI [%] | 65.49±2.79 | 66.17±2.81 | -0.68 | -2.14; 0.77 | 0.349 | 0.349 |

**Notes:**

Data are presented as mean±SD, unless otherwise indicated. MD - mean/median difference between the two groups with 95% confidence interval (CI). Groups were compared through the t-test or Mann-Whitney U testa. Benjamini–Hochberg (BH) correction for multiple comparisons was applied separately to each group of parameters as per first column, i.e. retinal thickness parameters (10 comparisons), retinal volume parameters (10 comparisons), ORL thickness parameters (5 comparisons) etc.

**Abbreviations:** I, inferior; mCVI, macular choroidal vascularity index; mLA, macular luminal area; mSA, macular stromal area; mTCA, macular total choroidal area; N, nasal; ONL, outer nuclear layer; ORL, outer retinal layer; RPE, retinal pigment epithelium; S, superior; SFCT, subfoveal choroidal thickness; T, temporal.

p<0.05 in bold

Supplementary Table 2. Univariate Linear Regression Analysis of Factors Associated with ORL Thickness in Controls

|  | Independent Variable | β | SE (Standard Error) | B | p | R2 | adjusted R2 |
| --- | --- | --- | --- | --- | --- | --- | --- |
| ORL Thickness Central Macular [µm] | General parameters | | | | | | |
| Age [years] | 0.016 | 0.044 | 0.062 | 0.714 | 0.004 | -0.025 |
| Sex, male | 0.389 | 0.841 | - | 0.646 | 0.006 | -0.022 |
| MAP [mmHg] | 0.015 | 0.039 | 0.072 | 0.704 | 0.005 | -0.029 |
| Caffeine, yes | -0.727 | 0.906 | - | 0.428 | 0.018 | -0.009 |
| Nicotine, yes | -0.457 | 1.131 | - | 0.689 | 0.005 | -0.024 |
| Ophthalmological parameters | | | | | | |
| IOP [mmHg] | 0.094 | 0.153 | 0.103 | 0.542 | 0.011 | -0.018 |
| AXL [mm] | -0.023 | 0.418 | -0.009 | 0.957 | 0.000 | -0.028 |
| Retinal Volume Total [µm3] | 2.344 | 1.457 | 0.263 | 0.116 | 0.069 | 0.042 |
| Choroidal Thickness Central Macular [µm] | -0.006 | 0.005 | -0.202 | 0.231 | 0.041 | 0.013 |
| SFCT [µm] | -0.006 | 0.004 | -0.227 | 0.176 | 0.052 | 0.025 |
| Choroidal Volume Central macular [mm3] | -7.981 | 6.240 | -0.211 | 0.209 | 0.045 | 0.017 |
| Choroidal Volume Total [mm3] | -0.154 | 0.230 | -0.112 | 0.509 | 0.013 | -0.016 |
| mCVI [%] | -0.00014 | 0.151 | 0.000 | 0.999 | 0.000 | -0.029 |
| mTCA [µm2] | 0.000 | 0.000 | -0.158 | 0.351 | 0.025 | -0.003 |
| mLA [µm2] | 0.000 | 0.000 | -0.165 | 0.330 | 0.027 | -0.001 |
| mSA [µm2] | 0.000 | 0.000 | -0.137 | 0.419 | 0.019 | -0.009 |

**Notes:**

**Abbreviations:** AXL, axial length; B, unstandardized beta coefficient; mCVI, macular choroidal vascularity index; IOP, intraocular pressure; mLA, macular luminal area; MAP, mean arterial pressure; PPH, precapillary pulmonary hypertension; mSA, macular stromal area; SFCT, subfoveal choroidal thickness; mTCA, macular total choroidal area; β, standardized beta coefficient.

Supplementary Figure 1 Schematic representation of central macular retinal and choroidal measurements.


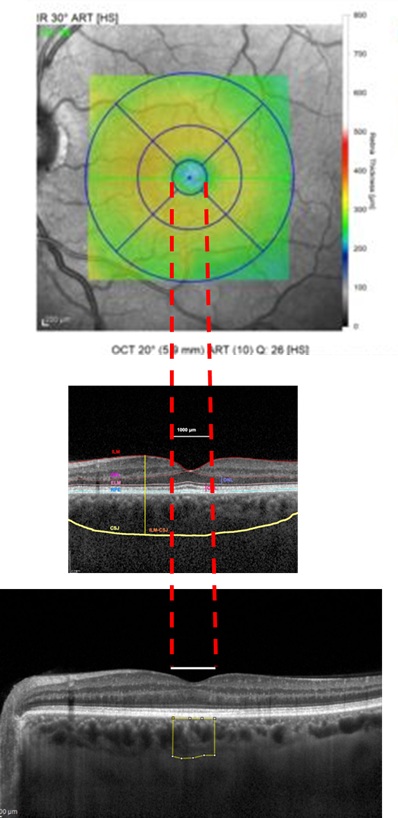


**Notes:**

Top panel shows the conventional en-face ETDRS grid with nine subfields: the central subfield (1-mm diameter, i., 500-µm radius), four inner subfields (3-mm ring, ie, 500–1500-µm radius), and four outer subfields (6-mm ring, ie, 1500–3000-µm radius).

Middle panel shows a representative macular SD-OCT B-scan with automated retinal layer segmentation and manual marking of the choroidal–scleral junction (CSJ) (corresponding to Figure 1 in the main text). The horizontal white line indicates a 1000-µm width.

Bottom panel shows a representative macular EDI-SD-OCT B-scan illustrating the first step of the image binarization workflow (corresponding to Figure 2 in the main text).

Red dotted lines indicate the corresponding 500-µm radius in the top panel and the 1000-µm width in the OCT panels.
